# Supplementary material
Source: Springer Nature journal article supplement (https://www.springermedizin.de/resource/supplementary/12950_2009_165_MOESM4_ESM.pdf/9558106)

Mast cells

Eosinophils

Control

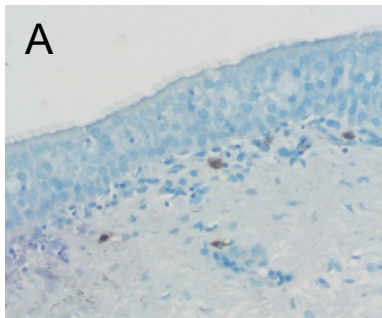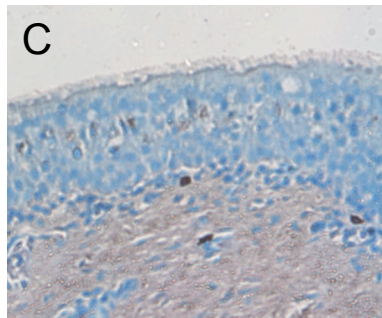

Allergic

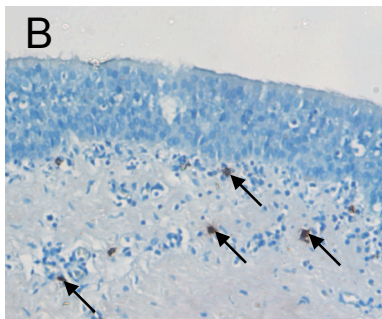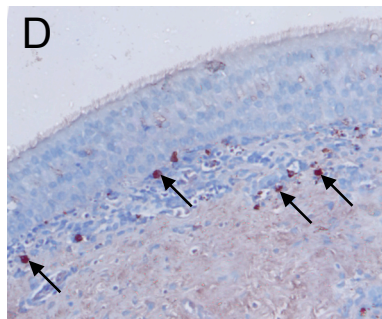

Supplement: MOESM4 [file 9558106]
